# Supplementary material for: A high-spin molecular wheel from self-assembled ‘Mn rods’
Source: Royal Society of Chemistry journal article supplement (doi:10.1039/b614492f), 2007-01-01
Supplement: b614492f.pdf [file b614492f.pdf]

**Supplementary Information**

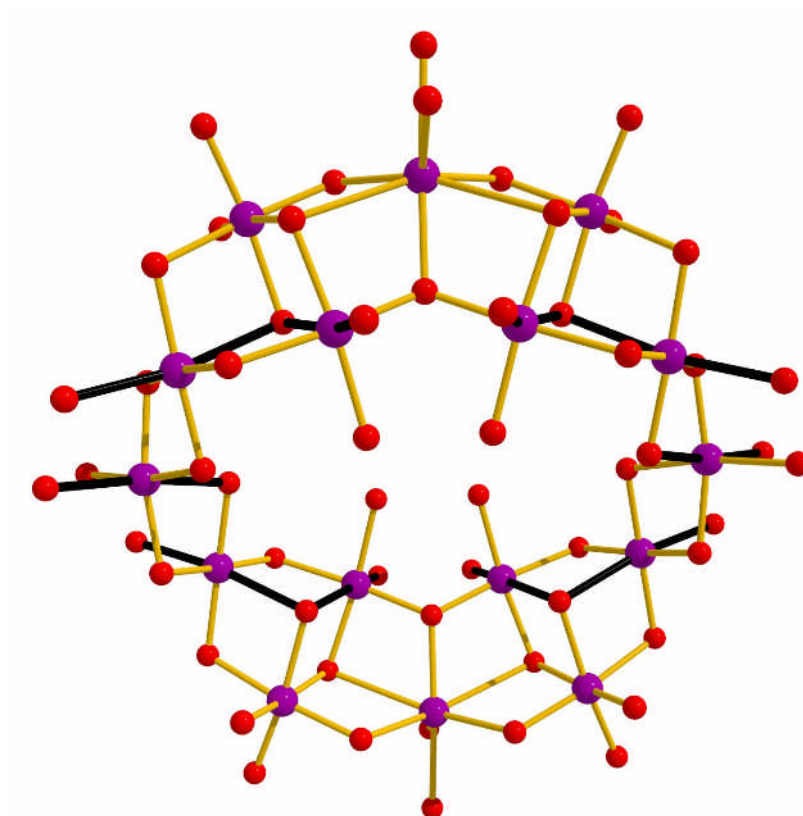

Figure SI1. The metal oxygen core of  $\text{Mn}_{16}$  (**1**) highlighting (in black) the positions of the Jahn-Teller axes of the  $\text{Mn}^{\text{III}}$  ions.

**Magnetism data for complex 1, Mn<sub>16</sub>.**

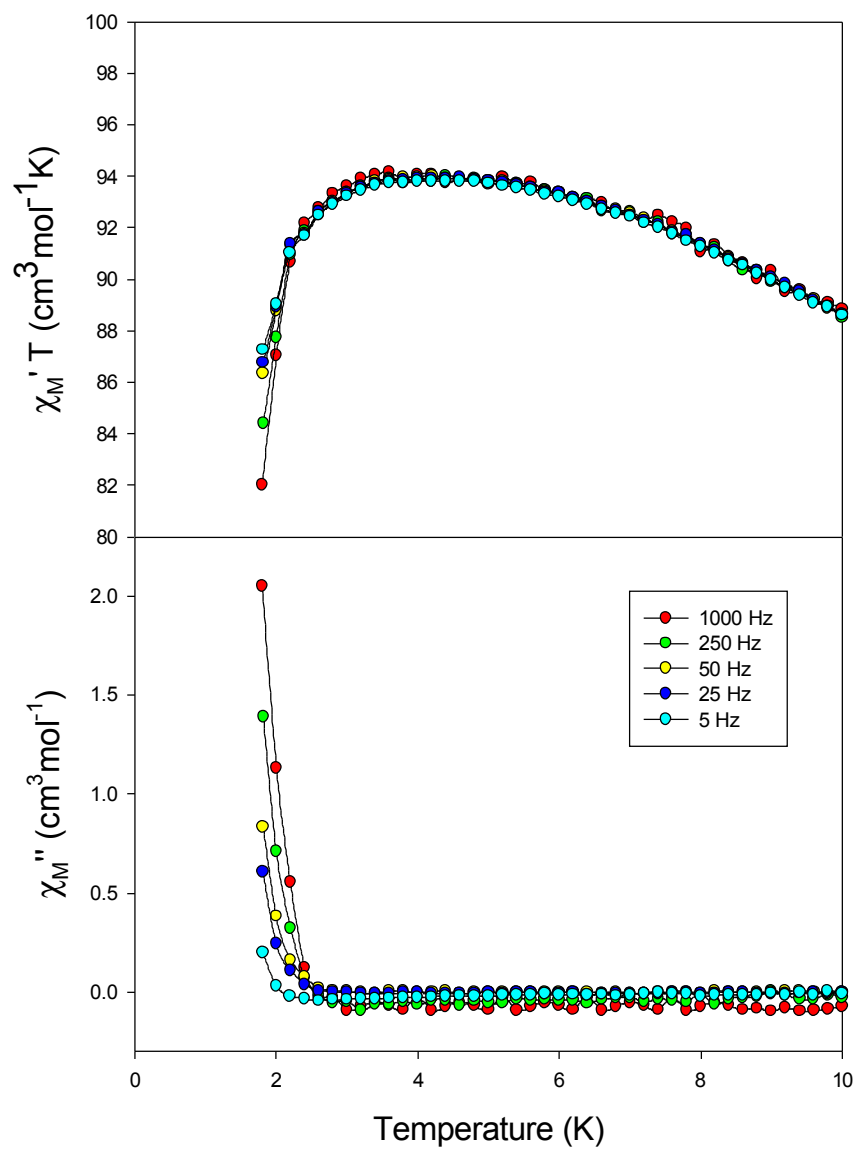

Figure SI2. Plots of the in-phase ( $\chi_M'$ ) signal as  $\chi_M' T$  and out-of-phase ( $\chi_M''$ ) signal in ac susceptibility studies vs. temperature for **1** in a 3.5 G field oscillating at the indicated frequencies.
